# Supplementary material
Source: publisher figshare collection journal article supplement (https://frontiersin.figshare.com/ndownloader/files/17710181)
Supplement: Supplementary file [file 17710181]

>EM29-396-uc483 (FLR)

TCCCCGCATGGCTGCCTGGGTCCAGCTCTGGCTCAATGGAAGCTCTGAGATTGACAAGGAAAAAGACAAGGA  
GCAGGATGCAGCTGAGTTCTCCTTTGCTGTCACAAACCTGGAGGACGCCGGGACATATCAGTGTCCGTACCA  
GGTGTCTAGAGCCACTGTGGACATCAAATCAGAGTGACCCCGTGGAG

>EMFLREM22UC483

GCCCCGGCCAGCTACCAGGGTCGAGCTGTATCAGGATGGACAGTGGAGATCCAGAAAGGAAATGGACCAGG  
AGCAGGACGTGGCTGAGTTCTCCTTGGCTGGAATAAAGAAGAAAGATTCTGGGGACATATCAGTGCCAGTACC  
AGGGGTTGGACCTGCAGGGACATCAGAGAAGAGTGACCCCGTGGAG

>EM1T7-1

GCCCCGGCCGGCTGCCTGGGTGAGCTGTACTGGGAGGGCAAGTGGAGATTCAGAAAAGAAATGGACCAGG  
AGCAGGACGTGGCTGAGTTCTCCTTGACTGGAATTAAGCAGGAAGATGCAGTGAGATATCAGTGCCAGTACC  
AGGGGTTGGAGCCTGCAGGGACATCGCAGAAGAGTGACCCCGTGGAG

>EM2T7-1

GCCCCAGCCAGCTGCCTGGGTTCGAGCTGTACCAGGATGGACAGTTGAGATCCATAAAGGAAATGGACCGGA  
AGCAGGACGTGGCTGAGTTCTCCTTGGCTGGCATAAAGAAGGAAGATTCTGGGGACATATCAGTGTCCGTACC  
AGGGGTTGGAGCCTGCAGGAACATCACAGAAGAGTGACCCCGTGGAG

>EM3T7-1

GCCCCAGTTGCACTTACAAGTTCAGCTCTGCCAGAACGGACATATGAGATCCAAGAAAGACGCGGAGATGCT  
TCAGGACACAGTTGAGTTTTCTTGGTTAGCGTAGAGAAGGAAGACGCAGAGAAGTATCGGTGCCAGTACCG  
GGTTTTGGAGCCACCGGGGACATCAGGGAAGAGTGACCCCGTGGAG

>EM4T7-1

GCCCCAGCCAGCTGCCTGGGTTCGAGCTGTACCAGGATGGACAGTTGAGATCCAGCAAGGAAATGGACCAGG  
AGCAGGACGTGGCTGAGTTCTCCTTGGCTGGCATAAAGAAGGAAGATTCTGGGGACATATCAGTGCCAGTACC  
AGGGGTTGGACCTGCAGGGACATCAGAGAAGAGTGACCCCGTGGAG

>EM5T7-1

GCCCCGCATGGCTGCCTGGGTCCAGCTCTGGCACAATGGAAGCTCTGAGATTGAAGAAGGAAAAAACAAGGA  
GCAGGATGCAGCTGTGTTCTCCTTTGCTGTCACAAACCTGGAGGACGCCGGGACGTATCAGTGTCCGTACCA  
GGTGTCAAAGCCTCTGAGGACATCCAAAAAGAGTGACCCCGTGGAG

>EM7T7-1

GCCCCGGCCGGCTGCCTGGGTGAGCTGTACAAGGAGGGAAAGTGGAGATCCAGAAAAGAAATGGACCAGG  
AGCAGGACGTGGCTGAGTTCTCCTTGACTGGAATTAAGCAGGAAGATGCAGTGAGATATCAGTGCCAGTACG  
AGGGGTTGGAGCAACCAGGGACATCGGAGAAGAGTGACCCCGTGGAG

>EM8T7-1

GCCCCGGCCAGCTACCAGGGTCGAGCTGTATCAGGATGGACAGTGGAGATCCAGAAAGGAAATGGACCAGG  
AGCAGGACGTGGCTGAGTTCTCCTTGGCTGGAATAAAGAAGAAAGATTCTGGGGACATATCAGTGCCAGTACC  
AGGGGTTGGACCTGCAGGGACATCAGAGAAGAGTGACCCCGTGGAG

>EM9T7-1

GCCCCGCATGGCTGCCTGGGTCCAGCTCTGGCACAATGGAAGCTCTGAGATTTGACAAGGAAAAAGACAAGGA  
GCAGGATGCAGCTGAGTTCTCCTTTGCTGTCACAAACCTGGAGGACGCCGGGACATATCAGTGTCCGTACCA  
GGTGTCTAGAGCCACTGTGGACATCAAATCAGAGTGACCCCGTGGAG

Fig. S1, page 1 of 1. Sequences of 39 clones of 190 base pairs from two independent amplifications of exon 2 from a line 6<sub>1</sub> chicken, plus the two FLRs

>EM10T7-1  
GCCCCGCATGGCTGCCTGGGTCCAGCTCTGGCTCAATGGAACCTCTGAGATTTAACAAGGAAAAAGACAAGGA  
GCAGGATGCAGCTGAGTTCTCCTTTGCTGTCACAAACCTGGAGGACGCCGGGATATATCAGTGTCGGTACCAG  
GTGTCAGAGCCACTGTGGACATCAAATCAGAGTGACCCCGTGGAG

>EM11T7-1  
GCCTCAGCCGGCTGCCTGGGTCCGACTCTTTTGGTACCAAAATCCAACATACATCGAGCAGAAGGACAAAACG  
CAGGAAATGGCAGAGTTCTCCTTCCGTAGCGCAAGTCATGATCAAGCAGGTACATATTTGTGCCAGTACCAGG  
TGTCTGAGTCAGAGGACGTATCAGTGATGAGTGACCCTGTGGAG

>EM12T7-1  
GCCCCGGCCGGCTGCCTGGGTCTGGCTGTATCTGGAAGGACGTTGGTCATACGCCAAGTACAGTGACAAGAA  
GCAGGACACGACAGAGTTCTCCTTCTTAGTGCAAGTCAGGATCAAGCAGGTACATATTTGTGCCAGTACCAG  
GTGTCTGAGTCAGAGGACGTATCAGTGATGAGTGACCCCGTGGAG

>EM13T7-1  
GCCCCAACTGGCTGCCTGGGTCTGGCTGTACCAGGAAGGAGGTAGGACACACAACAAGTACAAGGACAAGG  
AGCAGGATGCAGTCGAGTTCTCTTTTGGTAACACAAGTTGGAAACATGCGGGGACGTATCGGTGCCATTACCA  
TGTGTCTGAGCCACTGGGGACTTCAGAGAAGAGCGATCCTGTGGAG

>EM14T7-1  
GCCCCGCGTGGATGCCTGGGTCCAGCTCTGGCACAATGGAACCTCTGAGATTTAACAAGGAAAAAGACAAGGA  
GCAGGATGCAGCTGAGTTCTCCTTTGCTGTCACAAACCTGGAGGACGCCGGGACGTATCAGTGTCGGTACCA  
GGTGTCAAAGCCTCTGAGGACATCCAAAAAGAGTGACCCCGTGGAG

>EM15T7-1  
GCCCCGCATGGCTGCCTGGGTCCAGCTCTGGCTCAATGGAACCTCTGAGATTTGACAAGGAAAAAGACAAGGA  
GCAGGATGCAGCTGAGTTCTCCTTTGCTGTCACAAACCTGGAGGACGCCGGGACATATCAGTGTCGGTACCA  
GGTGTCAAAGCCTCTGAGGACATCCAAAAAGAGTGACCCCGTGGAG

>EM16T7-1  
GCCCCGCATGGCTGCCTGGGTCCAGCTCTGGCACAATGGAACCTCTGAGATTTAACAAGGAAAAAGACAAGGA  
GCAGGATGCAGCTGAGTTCTCCTTTGCTGTCACAAACCTGGAGGACGCCGGGACATATCAGTGTCGGTACCA  
GGTGTCAGAGCCACTGTGGACATCAAATCAGAGTGACCCCGTGGAG

>EM17T7-1  
GCCCCAGTTGCACTTACAAGTTCAGCTCTGCCAGAACGGACATATGAGATCCAAGAAAGACGCGGAGATGCT  
TCAGGACACAGTTGAGTTTTCTTGGTTAGCGTAGAGAAGGAAGACGCAGAGAAGTATCGGTGCCAGTACCG  
GGTTTTGGAGCCACCGGGGACATCAGGGAAGAGTGACCCTGTGGAG

>EM18T7-1  
GCCCCAGCCAGCTGCCAGGGTCGAACTGTACCAGGAAGAAAAGTTGAGATCCAGCAAGGAAATGGACCAGG  
AGCATGACGTGGCTGAGTTCTCCTTGGCTGGAATTAAGCAGGAAGATGCAGTGAGATATCAGTGCCAGTACC  
AGGGGTTGGAGCCTGTAGGGACATCGGAGAAGAGTGACCCCGTGGAG

>EM19T7-1  
GCCCCGCATGGCTGCCTGGGTCCAGCTCTGGCTCAATGGAACCTCTGAGATTTAACGAGGAAAAAGACAAGGA  
GCAGGATACAGCTGAGTTCTCCTTTGCTGTCACAAACCTGGAGGACGCCGGGACATATCAGTGTCGGTACCAG  
GTGTCAGAGCCTCTGAGGACATCCAAAAAGAGTGACCCTGTGGAG

Fig. S1, continued page 2 of 4. Sequences of 39 clones of 190 base pairs from two independent amplifications of exon 2 from a line 6<sub>1</sub> chicken, plus the two FLRs

>EM20T7-1

GCCCCAGCCAGCTGCCTGGGTCTGGCTGTACCAGGAGGGAGGTTGGTCGTACAACAAGGGGAAGGAGAAGG  
AGCAGGATGTGGCCGAGTTCTCCTTTGTTAGCACACTGCGGGAACACGCAGGTCGTTATCAGTGTCACTACCG  
GGTGTCTATGGTCAGAAGAGGCATCAGAGAAGAGTGACCCCGTGGAG

>EM22T7-1

GCCCCGGCCAGCTACCAGGGTCGAGCTGTATCAGGATGGACAGTGGAGATCCAGAAAGGAAATGGACCAGG  
AGCAGGACGTGGCTGAGTTCTCCTTGGCTGGAATAAAGAAGAAAGATTTCGGGGACATATCAGTGCCAGTACC  
AGGGGTTGGCACCTGCAGGGACATCAGAGAAGAGTGACCCCGTGGAG

>EM23T7-1

GCCCCAGCTGGCTGCCTGGGTCTGGCTGTACCAGGAAAGAGGTTGGTCATACAACAAGGGGAAGGAGAAGG  
AGCAGGACGCGGCCGAGTTCTCCTTTGTTAGCACACAGCGGGAACACGCAGGTCGCTATCAGTGTCACTACCG  
GGGAGTCTTGGTCAGTAGGGGCATCAGAGAAGAGTGACCCCGTGGAG

>EM24T7-1

GCCCCAGCCGGCTGCACAAGTTGAGCTCTACCAGAACGGACATATGAGATCCAAGAAAGACATGGACATGCT  
ACAGAACACAGTTGAGTTTTCTTGTAGTGTAGAGAAGGAAGATGCAGAGAAGTATCGGTGCCAGTACCG  
GGTTTTGGAGCCACCAGGGATGTCAGGGAAGAGTGACCCCGTGGAG

>EM2T7-2

GCCCCGGTTAACCTTACAAGCTGAGCTCTGCCAGAACGGCCATTTGAGATCCAAGAAAGACATGGACAGACTT  
CAGGACACGGTTGAGTTTTCTTGGTTAGCGTAGAGAAGGAAGAGGCAGAGAAGTATCGGTGGCAGTACCG  
GGTTTTGGAGCCACCGGGGACATCAGGGAAGAGTGACCCCGTGGAG

>EM4T7-2 curated

GCCCCGCATGGCTGCCTGGGTCCAGCTCTGGCACAATGGAACCTGAGATTTGACAAGGAAAAAGACAAGGA  
GCAGGATGCAGCTGAGTTCTCCTTTGCTGTCAAACTGGAGGACGCCGGGACATATCAGTGTCCGTACCA  
GGTGTCAAGCCACTGTGGACATCAAATCAGAGTGACCCCGTGGAG

>EM5T7-2

GCCCCGGCCAGCTACCAGGGTCGAGCTGTATCAGGATGGACAGTGGAGATCCAGAAAGGAAATGGACCAGG  
AGCAGGACGTGGCTGAGTTCTCCTTGGCTGGAATAAAGAAGAAAGATTTCGGGGACATATCAGTGCCAGTACC  
AGGGGTTGGCACCTGCAGGGACATCAGAGAAGAGTGACCCCGTGGAG

>EM6T7-2 curated

GCCCCAGCTGGCTGCACAAGTTGAGCTCTACCAGAACGGACATATGAGATCCAAGAAAGACATGGACATGCT  
ACAGGACACAGTTGAGTTTTCTTGGTTAGTGTAGAGAAGGAAGATGCAGAGAAGTATCGGTGCCAGTACCG  
GGTTTTAGAGCCACCAGGGATGCCAGGGAAGAGTGACCCCGTGGAG

>EM7T7-2

GCCCCAGCCAGCTGCCTGGGTCTGAGCTGTACCAGGATGGACAGTTGAGATCCAGCAAGGAAATGGACCAGA  
AGCAGGACGCGGTTGAGTTCTCCTTGGCTGGCATAAAGAAGGAAGATTTCGGGGACATATCAGTGCCAGTACG  
AGGGGTTGGAGCAACCAGGGACATCGGAGAAGAGTGACCCCGTGGAG

>EM9T7-2 curated

GCCCCACATGGCTGCCTGGGTCTGGTTGTACCACGAAGAAGGTCGGTCGTACAACAAGGGGAAGAAGAAGG  
AGCAGGACGCGGCCGCGTTCTTTTTTGTAGCACACTGCAGGAACACGCAGGTCGTTACTGGTGTCACTACCG  
GGTGTCTGAGTCAGCCGAGGTGTCAAGAGTGACCCCTGTGGAG

Fig. S1, continued page 3 of 4. Sequences of 39 clones of 190 base pairs from two independent amplifications of exon 2 from a line 6<sub>1</sub> chicken, plus the two FLRs

>EM11T7-2  
 GCCCCAGTTGCACTTACAAGTTCAGCTCTGCCAGAACGGACATATGAGATCCAAGAAAGACGCGGAGATGCT  
 TCAGGACACAGTTGAGTTTTCTTGTTAGCGTAGAGAAGGAAGACGCAGAGAAGTATCGGTGCCAGTACCG  
 GGTTCCTGGAGCCACCGGGGACATCAGGGAAGAGTGACCCCGTGGAG

>EM12T7-2  
 GCCCCGCATGGCTGCCTGGGTCTGGCTGTACCAGGAAAGAGGTTGGTCGTACAACAAGGGGAAGGAGAAGG  
 AGCAGAACGCGGCCGAGTTCTTCTTTGTTAGCACAAAGCGGGAACACGCAGGTCGTTATCGGTGTCAGTACC  
 GGGTGTCTTGGTCAGTAGGGGCATCAGAGAAGAGTGACCCCGTGGAG

>EM13T7-2 curated  
 GCCCCGGCCGGCTGCCTGGGTGAGCTGTACTGGGAGGGCAAGTGGAGATTCAGAAAAGAAATGGACCAGG  
 AGCAGGACGTGGCTGAGTTCTCCTTGACTGGAATTAAGCAGGAAGATGCAGTGAGATATCAGTGCCAGTACC  
 AGGGGTTGGAGCCTGCAGGGACATCGCAGAAGAGTGACCCCGTGGAG

>EM14T7-2  
 GCCCCGGCCGGCTGCCTGGGTGAGCTGTACAAGGAGGGAAAGTGGAGATCCAGAAAAGAAATGGACCAGG  
 AGCAGGACGTGGCTGAGTTCTCCTTGACTGGAATTAAGCAGGAAGATGCAGTGAGATATCAGTGCCAGTACG  
 AGGGGTTGGAGCAACCAGGGACATCGGAGAAGAGTGACCCCGTGGAG

>EM15T7-2  
 GCCCCACATGGCTGCCTGGGTCTGGTTGTACCACGAAGAAGGTCGGTCGTACAACAAAGGGAAGAAGAAGG  
 AGCAGGACGCGGCCGCGTCTTTTTTTGTTAGCACACTGCAGGAACACGCAGGTCGTTACTGGTGTCACTACCG  
 GGTGTCTGAGTCAGCCGAGTTGTCACTGGAGAGTGACCCCGTGGAG

>EM16T7-2 curated  
 GCCTCAGCCGGCTGCCTGGGTCCGACTCTTTTGGTACCAAATCCAACATACATCGAGCAGAAGGACAAAAACG  
 CAGGAAATGGCAGAGTTCTCCTTGACTGGAATTAAGCAGGTAGATGCAGTGAGATATCAGTGCCAGTACCAG  
 GGGTTGGAGCAACCAGGCACATCAAATCAGAGTAACCCCGTGGAG

>EM18T7-2 curated  
 GCCCTGGTTGCCCTTACAAGTTGAGCTCTGCCAGAACGGACATTTGAGATCCAAGAAAGACGTGGAGATGCTT  
 CAGGACACGGTTGAGTTTTCTTGTTAGCCTAGAGAAGGAAGACGCAGAGAAGTATCGGTGCCAGTACCGG  
 GTTTTGGAGCCACCAGGGACATCAGGGAAGAGTGACCCCGTGGAG

>EM20T7-2 curated  
 GCCCCAGCCGGCTGCACAAGTTGAGCTCTACCAGAACGGACATATGAGATCCAAGAAAGACATGGACATGCT  
 ACAGAACACAGTTGAGTTTTCTTGCTTAGTGTAGAGAAGGAAGATGCAGAGAAGTATCGGTGCCTGTACCG  
 GGTTCCTGGAGCCACCAGGGATGTCAGGGAAGAGTGACCCCGTGGAG

>EM21T7-2 curated  
 GCCCCGGCCAGCTACCAGGGTCGAGCTGTATCAGGATGGACAGTGGAGATCCAGAAAGGAAATGGACCAGG  
 AGCAGGACGTGGCTGAGTTCTCCTTGGCTGGAATAAAGAAGAAAGATTGCGGGGACATATCAGTGCCAGTACC  
 AGGGGTTGGCACCTGCAGGGACATCAGAGAAGAGTGACCCCGTGGAG

Fig. S1, continued page 4 of 4. Sequences of 39 clones of 190 base pairs from two independent amplifications of exon 2 from a line 6<sub>1</sub> chicken, plus the two FLRs

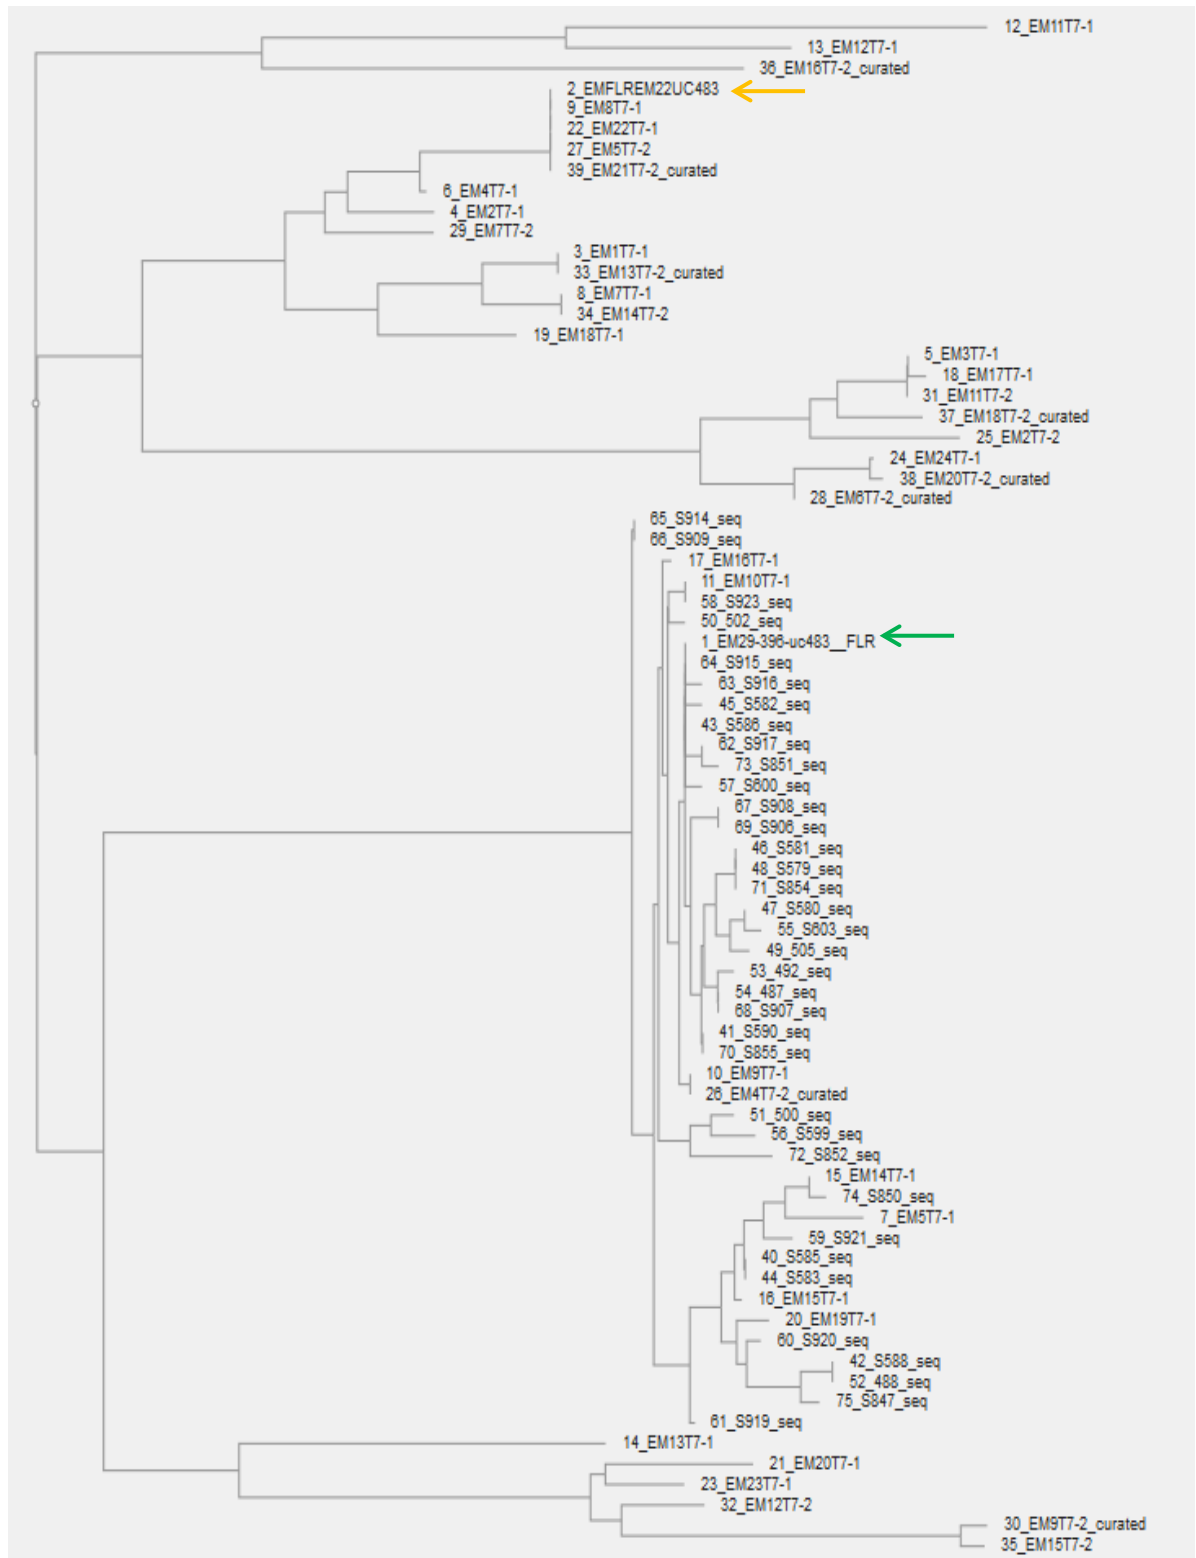

Fig. S2. Neighbour joining tree of 36 cloned sequences from Munich lines M11 and R11 (all indicated by names starting with S), and 39 sequences from a line 6<sub>1</sub> chicken (all indicated by names starting with EM), plus the two FLRs (indicated by arrows, orange for FLR22 and green for FLR29). The tree was constructed using MAFFT (<https://mafft.cbrc.jp/alignment/server/>) displayed using Archaeopteryx.js available on the same website.

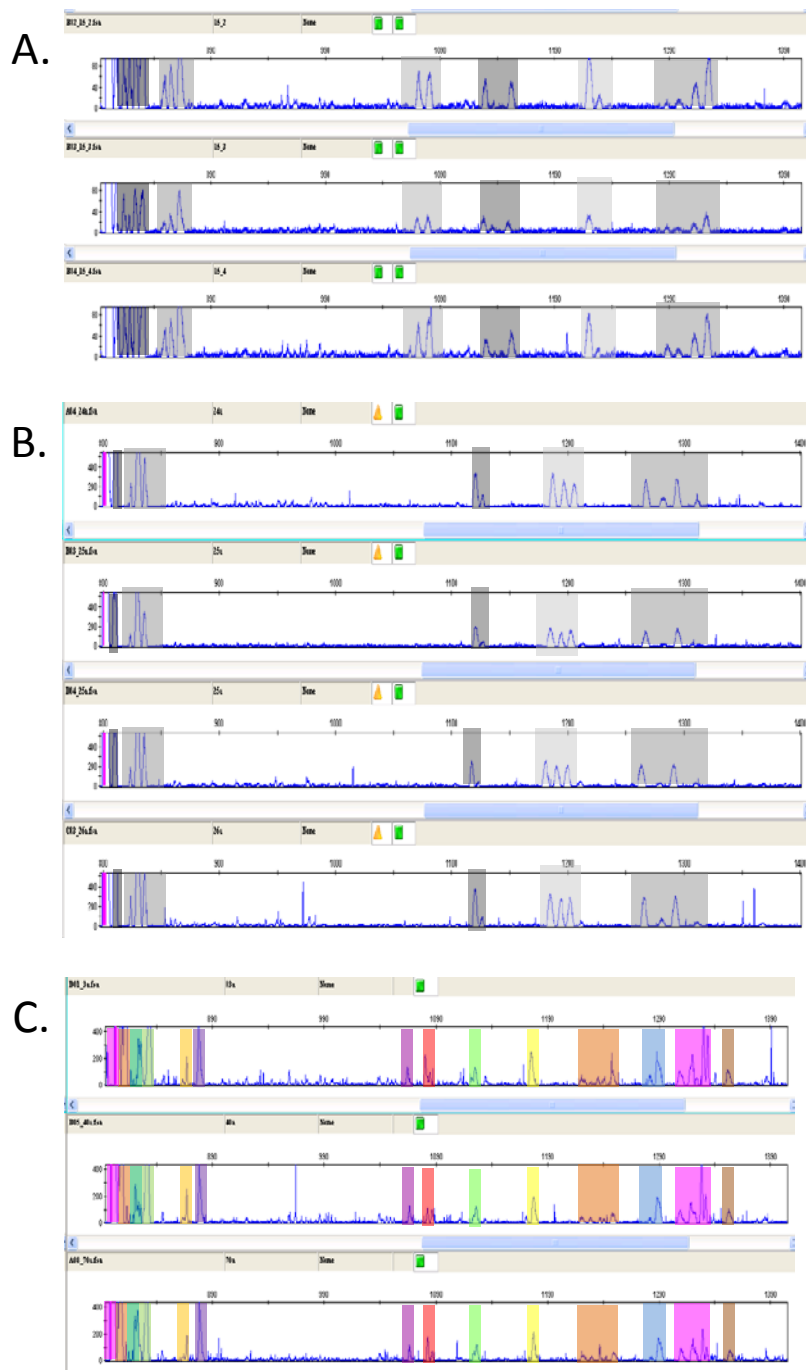

Fig. S3. RSCA of ChIR-AB1 amplicons using FLR29 show that patterns can be very reproducible between different individuals within a class of patterns on the same run.

- A. three individuals from line 15I (pattern 2),
- B. four individuals from line C-B4 (pattern 4c),
- C. three individuals from the first commercial broiler line

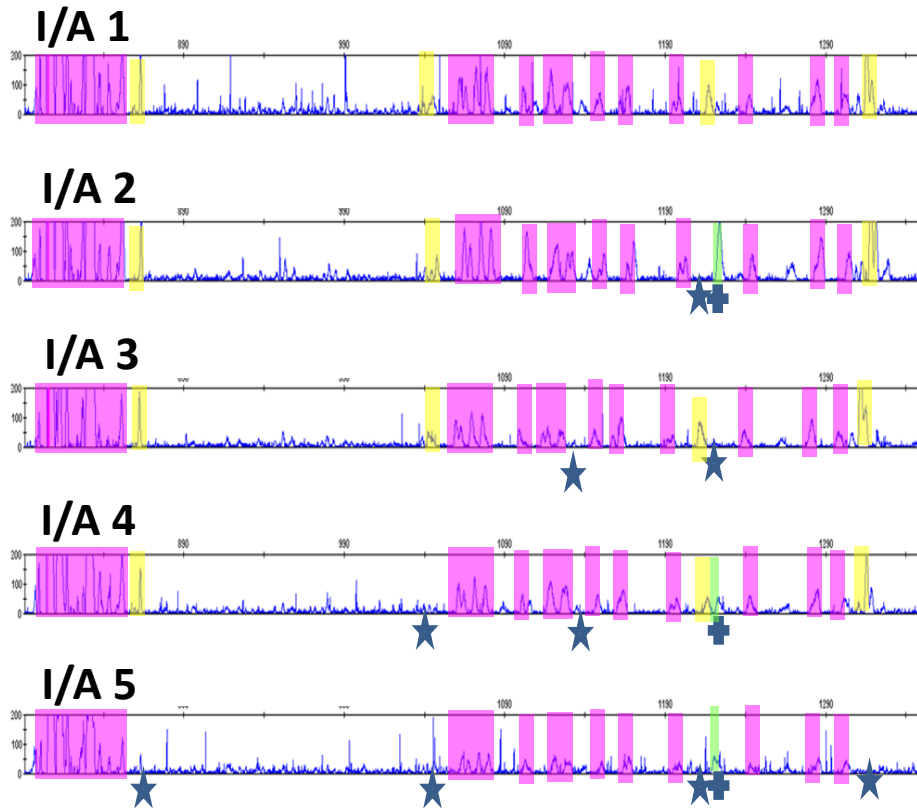

Fig. S4. RSCA of ChIR-AB1 amplicons from one group of commercial broiler chickens using FLR29 shows peaks that appear or disappear. Purple highlight indicates peaks common to all patterns shown, yellow highlight and star indicate peaks shared with pattern I/A-1, green highlight and plus sign indicate peaks not shared with pattern I/A-1.

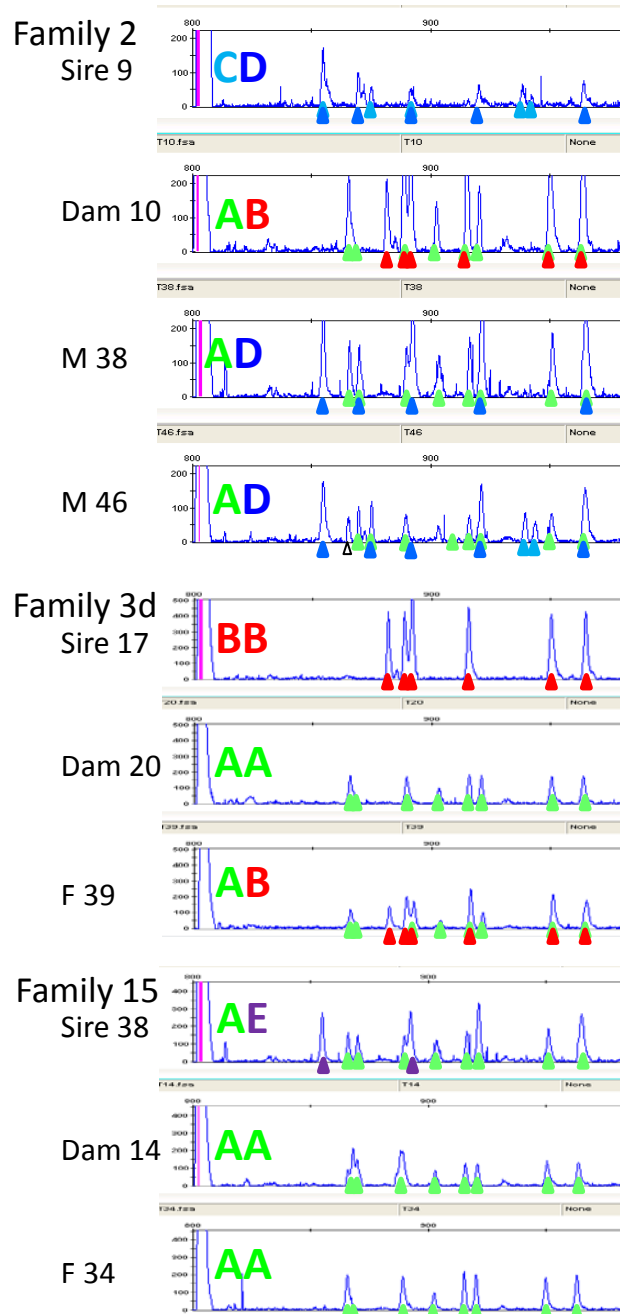

Fig. S5. Families (trios) in a line of commercial birds allow haplotypes to be discerned by analysis of RSCA patterns using FLR22. Letters indicate haplotypes with colours of triangles indicating peaks assigned to that haplotype. Page 1 of 2.



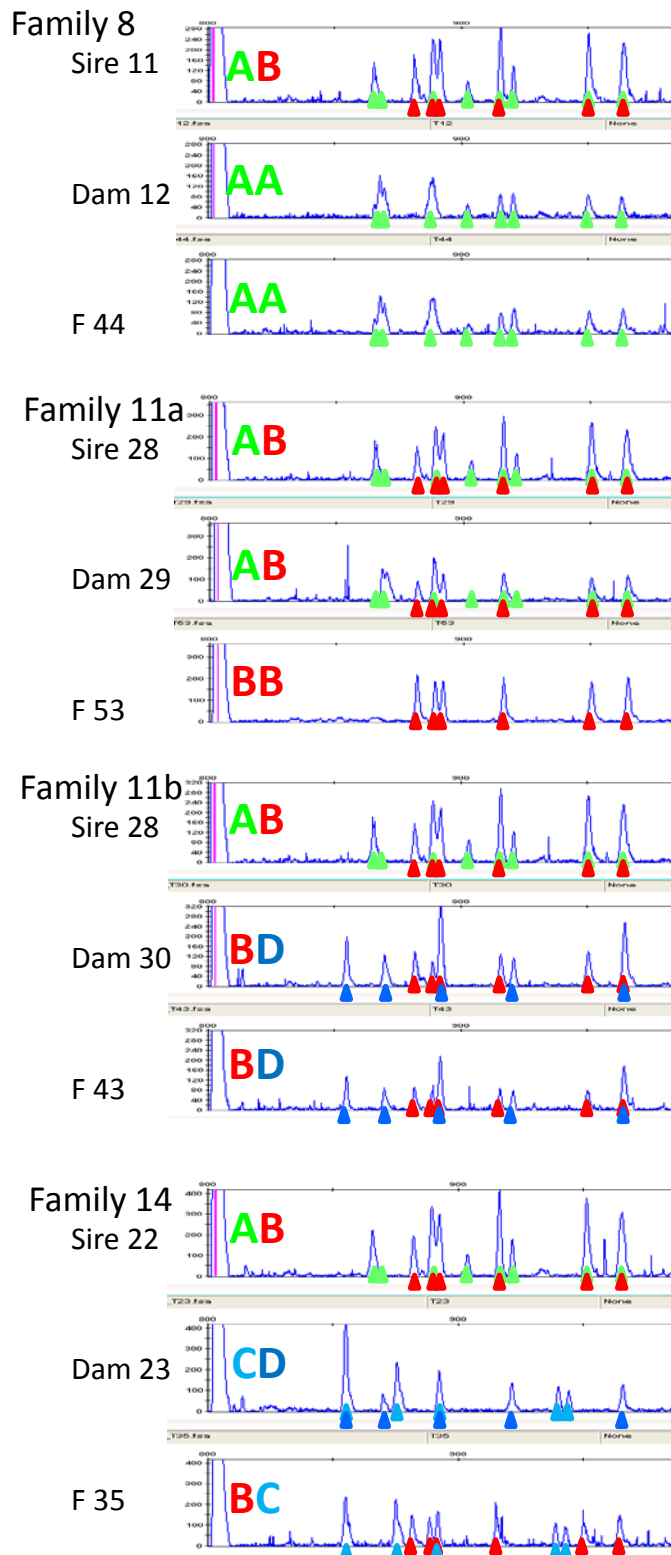

Fig. S5, continued. Families (trios) in a line of commercial birds allow haplotypes to be discerned by analysis of RSCA patterns using FLR22. Letters indicate haplotypes with colours of triangles indicating peaks assigned to that haplotype. Page 2 of 2.

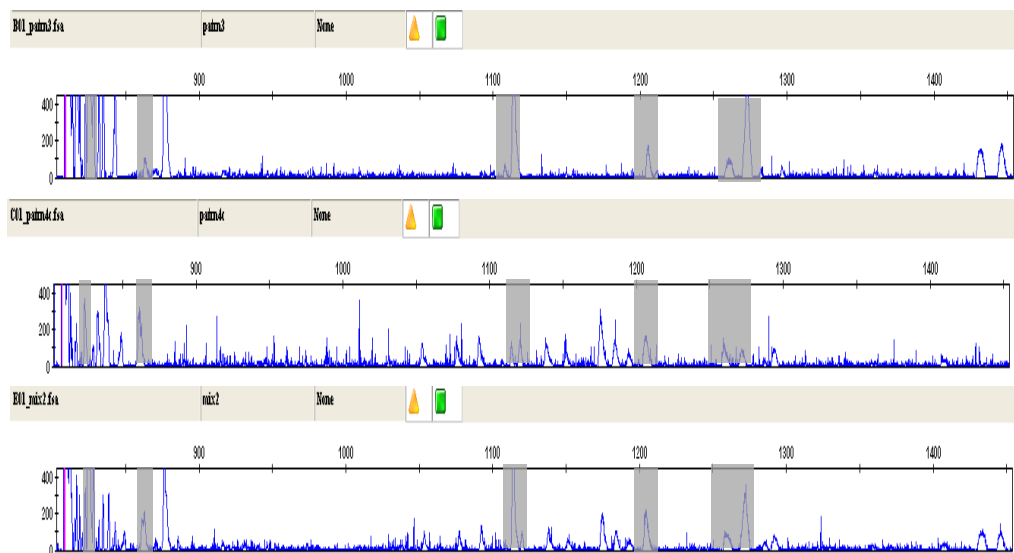

Fig. S6. RSCA with mixed samples identifies peaks with the same mobility, confirming identical peaks. Two samples with different peak patterns (3 and 4c) were analysed either separately (top two panels) or mixed together (half and half to give the same loading volume, bottom panel). The shaded peaks that appear to have the same mobility when analysed separately are confirmed to collapse to a single peak, while other peaks remain unchanged.
